# Supplementary material
Source: PubMed Central journal article supplement (PMC5784860)
Supplement: NIHMS871034-supplement-Supp_AppendixS1.pdf [file NIHMS871034-supplement-Supp_AppendixS1.pdf]

# Supplementary Web Appendix for: Robust estimation of encouragement-design intervention effects transported across sites

Kara E. Rudolph, Mark J. van der Laan

## 1 Identification proofs

### 1.1 ITTATE

$\psi_1$  is the intent-to-treat average effect of the instrument on the outcome for participants in the site without follow-up data ( $S = 0$ ), defined to be  $\psi_1 = E(Y^1 - Y^0 | S = 0)$ , where for each  $a \in \{0, 1\}$ ,  $Y^a$  denotes the counterfactual outcome that would be observed if instrument  $A = a$  were assigned and if  $Y$  were observed for participants with  $S = 0$ .

The assumptions needed for identifiability are:

1.  $E_0(Y | S = 0, W, A, Z) = E_0(Y | S = 1, W, A, Z)$ ,
2.  $A$  is independent of  $(Z^a, Y^a)$ , given  $W, S = 0$ , and
3.  $P_0(S = 1, A = a | W, Z) > 0$   $P_{0, W, Z | A=a, S=0}$ -a.e. This is the positivity assumption and means that every  $P(S = 1, A = a | W, Z)$  that one could draw from the true joint distribution of  $W, Z$  given  $A = a$  and  $S = 0$  must be greater than 0.

Proof.

$$\begin{aligned} \Psi_1(P) &\equiv E_0([E_0\{E_0(Y|S = 1, W, A = 1, Z)|S = 0, W, A = 1\} \\ &\quad - E_0\{E_0(Y|S = 1, W, A = 0, Z)|S = 0, W, A = 0\}]|S = 0) \end{aligned}$$

By assumption 1,

$$\begin{aligned} &\equiv E_0([E_0\{E_0(Y|S = 0, W, A = 1, Z)|S = 0, W, A = 1\} \\ &\quad - E_0\{E_0(Y|S = 0, W, A = 0, Z)|S = 0, W, A = 0\}]|S = 0) \end{aligned}$$

By assumption 2,

$$\begin{aligned} &P(Z = z | S = 0, W, A = a) = P(Z^a = z | S = 0, W), \text{ so} \\ &\equiv E_0[E_0\{E_0(Y^1 | S = 0, W, Z^1) | W, S = 0\} \\ &\quad - E_0\{E_0(Y^1 | S = 0, W, Z^1) | W, S = 0\} | S = 0] \\ &\equiv E_0(Y^1 - Y^0 | S = 0) \end{aligned}$$

By assumption 3, we have that  $\psi_1$  is defined.  $\square$

## 1.2 CACE

$\psi_3$  is the complier average effect of the exposure on the outcome in the site without long-term follow-up data, defined to be  $\psi_3 = E(Y^1 - Y^0 | Z^1 - Z^0 = 1, S = 0)$ , where for each  $a \in \{0, 1\}$ ,  $Y^a$  denotes the counterfactual outcome that would be observed if instrument  $A = a$  were assigned and if  $Y$  were observed for participants with  $S = 0$ , and  $Z^a$  denotes the counterfactual exposure that would be observed if instrument  $A = a$  were assigned.

The assumptions needed for identifiability are:

1.  $E_0(Y | S = 0, W, A, Z) = E_0(Y | S = 1, W, A, Z)$ ,
2.  $A = f_A(U_A)$  is independent of  $(Z^a, Y^a)$ , given  $W, S = 0$ ,
3.  $Y^{az} = Y^z$ , which is the exclusion restriction assumption, stating that the instrument  $A$  only affects the outcome  $Y$  through the exposure  $Z$ ,
4.  $Z^1 - Z^0 \geq 0$ , which is the monotonicity assumption, meaning that the instrument  $A$  cannot decrease exposure, and
5.  $P_0(S = 1, A = a | W, Z) > 0$   $P_{0,W,Z|A=a,S=0}$ -a.e and  $E_0(Z^1 - Z^0 | S = 0, W) \neq 0$ . This first part means that every  $P(S = 1, A = a | W, Z)$  that one could draw from the true joint distribution of  $W, Z$  given  $A = a$  and  $S = 0$  must be greater than 0. The second part means that the nontransported average effect of the instrument on the exposure of participants with  $S = 0$  does not equal 0.

Proof.

$$\begin{aligned}\Psi_3(P) &\equiv \frac{\Psi_1(P)}{\tilde{\Psi}(P)} \\ &\equiv \frac{\{E_0([E_0\{E_0(Y|S=1, W, A=1, Z)|S=0, W, A=1\} \\ &\quad - E_0\{E_0(Y|S=1, W, A=0, Z)|S=0, W, A=0\}]|S=0)\} \\ &\quad / [E_0\{E_0(Z|S=0, W, A=1) - E_0(Z|S=0, W, A=0)|S=0\}]\end{aligned}$$

By assumption 1,

$$\begin{aligned}&\equiv \frac{\{E_0([E_0\{E_0(Y|S=0, W, A=1, Z)|S=0, W, A=1\} \\ &\quad - E_0\{E_0(Y|S=0, W, A=0, Z)|S=0, W, A=0\}]|S=0)\} \\ &\quad / [E_0\{E_0(Z|S=0, W, A=1) - E_0(Z|S=0, W, A=0)|S=0\}]\end{aligned}$$

By assumption 2,

$$\begin{aligned}&P(Z=z | S=0, W, A=a) = P(Z^a=z | S=0, W), \text{ so} \\ &\equiv \frac{(E_0[E_0\{E_0(Y^1 | S=0, W, Z^1) | S=0, W\} \\ &\quad - E_0\{E_0(Y^0 | S=0, W, Z^0) | S=0, W\} | S=0]) \\ &\quad / [E_0\{E_0(Z^1|S=0, W) - E_0(Z^0|S=0, W)|S=0\}]}{E_0(Y^1 - Y^0 | S=0)} \\ &\equiv \frac{E_0(Y^1 - Y^0 | S=0)}{E_0(Z^1 - Z^0 | S=0)} \\ &\equiv \frac{\{E_0(Y^1 - Y^0|Z^1 - Z^0 = 1, S=0)P_0(Z^1 - Z^0 = 1|S=0) \\ &\quad + E_0(Y^1 - Y^0|Z^1 - Z^0 = 0, S=0)P_0(Z^1 - Z^0 = 0|S=0) \\ &\quad + E_0(Y^1 - Y^0|Z^1 - Z^0 = -1, S=0)P_0(Z^1 - Z^0 = -1|S=0)\}}{E_0(Z^1 - Z^0 | S=0)}\end{aligned}$$

By assumption 3,

$$\begin{aligned}&\equiv \frac{\{E_0(Y^1 - Y^0|Z^1 - Z^0 = 1, S=0)P_0(Z^1 - Z^0 = 1|S=0) \\ &\quad + E_0(Y^1 - Y^0|Z^1 - Z^0 = -1, S=0)P_0(Z^1 - Z^0 = -1|S=0)\}}{E_0(Z^1 - Z^0 | S=0)}\end{aligned}$$

By assumption 4,

$$\equiv \frac{E_0(Y^1 - Y^0|Z^1 - Z^0 = 1, S=0)P_0(Z^1 - Z^0 = 1|S=0)}{E_0(Z^1 - Z^0 | S=0)}$$

By assumption 4,

$$\begin{aligned}&Z^1 - Z^0 \text{ can only have values in } \{0, 1\}, \\ &\text{so the conditional expression is a conditional probability.} \\ &\equiv \frac{E_0(Y^1 - Y^0|Z^1 - Z^0 = 1, S=0)E(Z^1 - Z^0 | S=0)}{E_0(Z^1 - Z^0 | S=0)} \\ &\equiv E_0(Y^1 - Y^0|Z^1 - Z^0 = 1, S=0)\end{aligned}$$

By assumption 5, we have that  $\psi_3$  is defined.  $\square$

## 2 Robustness results

We derived each efficient influence curve  $D(P)(o)$  of  $\Psi$  on the nonparametric model by noting that it is given by the Gateaux derivative of  $\Psi$  at  $P$  in the direction  $(\delta_o - P\delta_o)$ , where  $\delta_o$  is the probability distribution that puts mass 1 on  $o$  (Gill et al., 1989):  $D(P)(o) = \lim_{\epsilon \rightarrow 0} \Psi[P + \epsilon\{\delta_o - P(o)\}] - \Psi(P)/\epsilon$ . In addition, we note that the efficient influence curve (EIC) for a parameter  $\Psi(P) = \Psi\{Q(P)\}$  is not affected by model assumptions on nuisance parameters whose tangent space is orthogonal to the tangent space of  $Q$ , so the EIC of the nonparametric model equals the EIC for the actual model.

### 2.1 ITTATE

#### 2.1.1 Efficient influence curve

The following result provides the conditions under which an efficient influence curve-based estimator is consistent. Let  $Q_W(w|s) = P(W \leq w | S = s)$ ,  $\bar{Q} = \{Q_W, \bar{Q}(1, W, A, Z)\}$ , and  $q_W(w|s) = \frac{dQ_W}{d\mu}(w)$  (i.e., density with respect to the appropriate dominating measure  $\mu$ ). Let  $G_Z\bar{Q}(W) = E\{\bar{Q}(1, W, a, Z) | A = a, W, S = 0\}$ . Recall that a subscript of 0 added to any of the above notation denotes values under the true data distribution,  $P_0$ .

**Result 1.** *We have*

$$P_0 D_{\Psi_1}^a(P) = \Psi_1^a(P_0) - \Psi_1^a(P) + R_2^a(P, P_0),$$

where

$$R_2^a(P, P_0) = \sum_{j=1}^4 R_{2j}^a(P, P_0),$$

and

$$\begin{aligned} R_{21}^a &= Q_{W,0|S=0} \left\{ \frac{g_{A,0|S=0} P_0(S=0)}{g_{A|S=0} P(S=0)} - 1 \right\} (G_{0,Z} - G_Z) \bar{Q} \\ R_{22}^a &= Q_{W|S=0} G_Z \left\{ \frac{g_{A,0|S=1} q_{W,0|S=1} P_0(S=0)}{g_{A|S=1} q_{W|S=1} P(S=0)} \frac{g_{Z,0|S=1}}{g_{Z|S=1}} - 1 \right\} (\bar{Q}_0 - \bar{Q}) \\ R_{23}^a &= (Q_{W,0|S=0} - Q_{W|S=0}) G_Z (\bar{Q} - \bar{Q}_0) \\ R_{24}^a &= Q_{W,0|S=0} (G_{Z,0} - G_Z) (\bar{Q} - \bar{Q}_0). \end{aligned}$$

Inspection of the second order term  $R_2^a$  gives three scenarios under which an estimator  $\Psi_1^a(P_n)$  that solves the efficient influence equation  $P_n D_{\Psi_1}^a(P_n)$  will be consistent (robustness result). First, if  $Q_W, G_Z, g_A, q_{W|S=1}$ , and  $P(S=0)$  are correctly specified in the sense that  $(Q_{W|S=0} - Q_{W,0|S=0}) G_Z (\bar{Q} - \bar{Q}_0) = 0$ ,  $G_Z = G_{Z,0}$ ,  $g_{A|S=1} = g_{A,0|S=1}$ ,  $q_{W|S=1} = q_{W,0|S=1}$ , and  $P(S=0) = P_0(S=0)$ . In other words, the  $Y$  model may be misspecified if all other models are correct. Second, if  $\bar{Q}$  and  $G_Z$  are correctly specified in the sense that  $\bar{Q} = \bar{Q}_0$ ,  $G_Z = G_{Z,0}$ . In other words, the  $S$  and  $A$  models may be misspecified if the  $Y$  and  $Z$  models are correct. Third, if  $\bar{Q}$  and  $g_A$  (and  $P(S=0)$ ) are

correctly specified in the sense that  $\bar{Q} = \bar{Q}_0$ ,  $g_{A|S=0} = g_{A,0|S=0}$ ,  $P(S=0) = P_0(S=0)$ . In other words, the  $S$  and  $Z$  models may be misspecified if the  $Y$  and  $A$  models are correct.

**Corollary 1.** *If  $P_0 D_{\Psi_1^a}(P) = 0$  and one of three above scenarios holds, then  $\Psi_1^a(P) = \Psi_1^a(P_0)$ .*

The implication of this corollary is that if  $P_n$  of  $P_0$  converges to a  $P$  so that  $P_0 D(P) = 0$  (which will be true for a TMLE since a TMLE solves  $P_n D(P_n) = 0$ ) and one of the above three scenarios holds, then  $\Psi_1^a(P_n)$  is consistent for  $\Psi_1^a(P_0)$ .

## 2.2 EACE

The following result provides the conditions for consistency based on the efficient influence curve.

**Result 2.**

$$P_0 D_{\Psi_2^z}(P) = \Psi_2^z(P_0) - \Psi_2^z(P) + R_2^z(P, P_0),$$

where

$$R_2^z(P, P_0) = R_{21}^z(P, P_0) + R_{22}^z(P, P_0) + R_{23}^z(P, P_0),$$

and

$$\begin{aligned} R_{21}^z(P, P_0) &= \int \frac{g_0(S=1, Z=z | W) - g(S=1, Z=z | W)}{g(S=1, Z=z | W)} (\bar{Q}_0 - \bar{Q})(W) \frac{g_S(S=0 | W)}{P(S=0)} dP_0(W) \\ R_{22}^z(P, P_0) &= (Q_W - Q_{0,W})(\bar{Q}_0 - \bar{Q}) \\ &\quad + \int \frac{g_S(S=0 | W)}{P(S=0)} (\bar{Q}_0 - \bar{Q}) d(P - P_0)(W) \\ R_{23}^z(P, P_0) &= \frac{(P_0 - P)(S=0)}{P(S=0)} (Q_{0,W} - Q_W) \bar{Q}. \end{aligned}$$

Considering the case that  $P(S=1) = P_0(S=1)$  so that  $R_{23}^z = 0$ , we have two scenarios under which an estimator that solves the efficient influence curve will be consistent (robustness result). First, if  $\bar{Q} = \bar{Q}_0$  (i.e., the  $Y$  model is correct). Second, if  $P(S=1, Z=z | W) = P_0(S=1, Z=z | W)$  and  $(Q_W, P_W) = (Q_{0,W}, P_{0,W})$  (i.e., the  $S$  and  $Z$  models are correct).

**Corollary 2.** *If  $P_0 D_{\Psi_2^z}(P) = 0$  and one of two above scenarios holds, then  $\Psi_2^z(P) = \Psi_2^z(P_0)$ .*

The implication of this corollary is that if  $P_n$  of  $P_0$  converges to a  $P$  so that  $P_0 D(P) = 0$  (which will be true for a TMLE since a TMLE solves  $P_n D(P_n) = 0$ ) and one of the above two scenarios holds, then  $\Psi_2^z(P_n)$  is consistent for  $\Psi_2^z(P_0)$ .

## 2.3 CACE

### 2.3.1 Efficient influence curve

We know the efficient influence curve of  $\Psi_1$  and  $\tilde{\Psi}$ , so by the delta method, the efficient influence curve of  $\Psi_3$  is given by the following ratio:

$\Psi_3(P) = \frac{\Psi_1(P)}{\tilde{\Psi}(P)}$ , where  $\tilde{\Psi}(P)$  is the statistical estimand of the average effect of the instrument on the treatment.

$$\begin{aligned} D_{\Psi_1, \tilde{\Psi}}^a(P) &= \left\{ \frac{\Psi_1(P)}{\tilde{\Psi}(P)} \right\}' \\ &= \frac{\tilde{\Psi}(P)\Psi_1(P)' - \Psi_1(P)\tilde{\Psi}(P)'}{\tilde{\Psi}(P)^2} \\ &= \frac{\tilde{\Psi}(P)D_{\Psi_1}(P) - \Psi_1(P)D_{\tilde{\Psi}}(P)}{\tilde{\Psi}(P)^2} \\ &= \frac{1}{\tilde{\Psi}(P)}D_{\Psi_1}(P) - \frac{\Psi_1(P)}{\tilde{\Psi}(P)^2}D_{\tilde{\Psi}}(P) \end{aligned}$$

## 3 Alternative ITTATE TMLE

Let  $Pa(Z)$  represent variables that are parents of  $Z$ . If  $Z$  is binary, then we can use that for any function  $S\{Z | Pa(Z)\}$  with conditional mean zero, given  $Pa(Z)$ , we have

$$S\{Z | Pa(Z)\} = [S\{1 | Pa(Z)\} - S\{0 | Pa(Z)\}][Z - E\{Z | Pa(Z)\}]$$

(Van der Laan and Robins, 2003). Therefore, we can rewrite  $D_Z^a(P)$  as follows:

$$\begin{aligned} D_{Z, \Psi_1}^a(P) &= \frac{I(A = a, S = 0)}{g_A(A = a | W, S = 0)P(S = 0)} \{ \bar{Q}(1, W, a, Z = 1) - \bar{Q}(1, W, a, Z = 0) \} \\ &\quad \times \{ Z - g_Z(Z = 1 | S = 0, W, a) \} \\ &\equiv C_Z(g_A, \bar{Q}) \{ Z - g_Z(Z = 1 | S = 0, W, a) \}. \end{aligned}$$

As in the TMLE shown in the main text, consider submodel  $\text{Logit}\bar{Q}_n^0(\epsilon) = \text{Logit}\bar{Q}_n^0 + \epsilon C_Y(g_{Z,n}^0, g_{S,n}^0)$ , and let  $\epsilon_n^0$  be the fitted coefficient for this clever covariate  $C_Y$  in the univariate logistic regression model using  $\text{Logit}\bar{Q}_n^0$  as offset, using the binary log-likelihood loss function multiplied with  $I(S = 1, A = a)$  (i.e., only using the observations with  $S_i = 1, A_i = a$ ). The updated estimator is denoted with  $\bar{Q}_n^1 = \bar{Q}_n^0(\epsilon_n^0)$ . Consider the submodel

$$\text{Logit}\bar{g}_{Z,n}^0(\epsilon) = \text{Logit}\bar{g}_{Z,n}^0 + \epsilon C_Z(g_{A,n}, \bar{Q}_n^0).$$

Let  $\epsilon_{1n}^0$  be the fitted coefficient using logistic regression of  $Z = z$  on  $W$  among the observations with  $S_i = 0, A_i = a$ , using predicted values  $\text{Logit}\bar{g}_{Z,n}^0$  as an offset. This defines now  $g_{Z,n}^1 = g_{Z,n}^0(\epsilon_{1n}^0)$ . This process can be iterated: Let  $k = 0$ , set  $\bar{Q}_n^{k+1} = \bar{Q}_n^k(\epsilon_n^k)$  and  $g_{Z,n}^{k+1} = g_{Z,n}^k(\epsilon_{1n}^k)$ , set  $k \leftarrow k + 1$ , and repeat until convergence. Assume that  $\epsilon_n^k, \epsilon_{1n}^k$  converge to

zero as  $k \rightarrow \infty$  or that at a step  $K$  we have that  $P_n D_{Z, \Psi_1}^a(g_{A,n}, g_{Z,n}^K, g_{S,n}, \bar{Q}_n^K, Q_{W,n|S=0}) = o_P(1/\sqrt{n})$ . Let  $g_{Z,n}^*, \bar{Q}_n^*$  denote the resulting final fits. The TMLE of  $\psi_{0,1}^a$  is defined by the substitution estimator  $\psi_{n,1}^{a*} = \Psi_1^a(g_{Z,n}^*, \bar{Q}_n^*, Q_{W,n|S=0})$ . This TLME solves

$$P_n D_{Z, \Psi_1}^a(g_{S,n}, g_{A,n}, g_{Z,n}^*, \bar{Q}_n^*, Q_{W,n|S=0}) = 0 \text{ or } o_P(1/\sqrt{n}).$$

#### 4 Alternative variance estimate of $\Psi_3$

Alternatively,  $\text{var}(\Psi_3)$  can be estimated using the multivariate delta method.

$$\begin{aligned} \text{Var}\left(\frac{\Psi_1}{\dot{\Psi}}\right) &= \left(\nabla \frac{\Psi_1}{\dot{\Psi}}\right)' \text{Cov}(\Psi_1, \tilde{\Psi}) \left(\nabla \frac{\Psi_1}{\dot{\Psi}}\right) \\ &= \begin{bmatrix} 1 & -\mu_1 \\ \tilde{\mu} & \tilde{\mu}^2 \end{bmatrix} \begin{bmatrix} \sigma_1^2 & \sigma_1 \tilde{\sigma} \\ \sigma_1 \tilde{\sigma} & \tilde{\sigma}^2 \end{bmatrix} \begin{bmatrix} \frac{1}{\tilde{\mu}} \\ \frac{-\mu_1}{\tilde{\mu}^2} \end{bmatrix} \\ &= \begin{bmatrix} \frac{\sigma_1^2}{\tilde{\mu}} - \frac{\mu_1 \sigma_1 \tilde{\sigma}}{\tilde{\mu}^2}, & \frac{\sigma_1 \tilde{\sigma}}{\tilde{\mu}} - \frac{\tilde{\sigma}^2 \mu_1}{\tilde{\mu}^2} \end{bmatrix} \begin{bmatrix} \frac{1}{\tilde{\mu}} \\ \frac{-\mu_1}{\tilde{\mu}^2} \end{bmatrix} \\ &= \frac{\sigma_1^2}{\tilde{\mu}^2} - \frac{\mu_1 \sigma_1 \tilde{\sigma}}{\tilde{\mu}^2} - \frac{\mu_1 \sigma_1 \tilde{\sigma}}{\tilde{\mu}^3} + \frac{\tilde{\sigma}^2 \mu_1^2}{\tilde{\mu}^4} \\ &= \frac{1}{\tilde{\mu}^2} \left( \sigma_1^2 - \frac{2\mu_1 \sigma_1 \tilde{\sigma}}{\tilde{\mu}} + \frac{\tilde{\sigma}^2 \mu_1^2}{\tilde{\mu}^2} \right) \\ &= \frac{\mu_1^2}{\tilde{\mu}^2} \left( \frac{\sigma_1^2}{\mu_1^2} - \frac{2\sigma_1 \tilde{\sigma}}{\mu_1 \tilde{\mu}} + \frac{\tilde{\sigma}^2}{\tilde{\mu}^2} \right) \end{aligned}$$

## 5 Simulation results

Table 1: Results from data-generating mechanism 1 without positivity violations. TMLE estimator performance under correct and incorrect model specification across 10,000 simulations in terms of percent bias, estimator standard error  $\times \sqrt{n}$ , 95% confidence interval coverage, and mean squared error.  $N=500$ . The estimator standard error  $\times \sqrt{n}$  should be compared to the efficiency bound, which is 0.47 for the ITTATE, 1.42 for the CACE, and 0.51 for the EACE.

| Specification                                                                  | %Bias | SE $\times \sqrt{n}$ | 95%CI Cov | MSE    |
|--------------------------------------------------------------------------------|-------|----------------------|-----------|--------|
| bound, which is 1.49 for the ITTATE, 4.50 for the CACE, and 1.60 for the EACE. |       |                      |           |        |
| ITTATE                                                                         |       |                      |           |        |
| All models correct                                                             | -0.09 | 1.53                 | 94.75     | 0.0048 |
| S model misspecified                                                           | 0.03  | 1.39                 | 94.91     | 0.0039 |
| Z model misspecified                                                           | -0.09 | 1.51                 | 94.40     | 0.0048 |
| Y model misspecified                                                           | -0.03 | 1.56                 | 94.85     | 0.0049 |
| S,Z models misspecified                                                        | 0.11  | 1.37                 | 94.80     | 0.0038 |
| S,Z,Y models misspecified                                                      | 6.82  | 1.39                 | 94.80     | 0.0039 |
| EACE                                                                           |       |                      |           |        |
| All models correct                                                             | -1.27 | 1.62                 | 94.70     | 0.0052 |
| S model misspecified                                                           | -0.83 | 1.46                 | 93.60     | 0.0047 |
| Z model misspecified                                                           | -1.27 | 1.49                 | 92.82     | 0.0052 |
| Y model misspecified                                                           | -1.17 | 1.65                 | 95.40     | 0.0052 |
| S,Z models misspecified                                                        | -0.88 | 1.35                 | 93.09     | 0.0042 |
| S,Z,Y models misspecified                                                      | 13.98 | 1.37                 | 94.03     | 0.0041 |
| CACE                                                                           |       |                      |           |        |
| All models correct                                                             | 0.55  | 4.86                 | 96.02     | 0.0495 |
| S model misspecified                                                           | 0.57  | 4.40                 | 96.11     | 0.0397 |
| Z model misspecified                                                           | 0.55  | 4.81                 | 95.93     | 0.0495 |
| Y model misspecified                                                           | 0.56  | 4.86                 | 95.81     | 0.0503 |
| S,Z models misspecified                                                        | 0.78  | 4.35                 | 96.27     | 0.0380 |
| S,Z,Y models misspecified                                                      | 7.16  | 4.41                 | 96.34     | 0.0390 |



Table 2: Results from data-generating mechanism 2 with practical positivity violations. TMLE estimator performance under correct and incorrect model specification across 10,000 simulations in terms of percent bias, estimator standard error  $\times\sqrt{n}$ , 95% confidence interval coverage, and mean squared error.  $N=500$ . The estimator standard error  $\times\sqrt{n}$  should be compared to the efficiency bound, which is 0.85 for the ITTATE, 3.58 for the CACE, and 1.29 for the EACE.

| Specification             | %Bias  | SE $\times\sqrt{n}$ | 95%CI Cov | MSE    |
|---------------------------|--------|---------------------|-----------|--------|
| ITTATE                    |        |                     |           |        |
| All models correct        | 3.32   | 2.68                | 92.09     | 0.0165 |
| S model misspecified      | -0.06  | 1.40                | 95.18     | 0.0039 |
| Z model misspecified      | 3.32   | 2.75                | 92.68     | 0.0165 |
| Y model misspecified      | 7.72   | 2.91                | 93.84     | 0.0167 |
| S,Z models misspecified   | -0.25  | 1.40                | 95.42     | 0.0038 |
| S,Z,Y models misspecified | 18.87  | 1.42                | 94.97     | 0.0040 |
| EACE                      |        |                     |           |        |
| All models correct        | -11.13 | 3.21                | 87.31     | 0.0246 |
| S model misspecified      | -2.40  | 1.88                | 83.77     | 0.0122 |
| Z model misspecified      | -11.13 | 2.63                | 84.38     | 0.0246 |
| Y model misspecified      | -4.54  | 3.73                | 91.34     | 0.0242 |
| S,Z models misspecified   | 0.55   | 1.38                | 78.59     | 0.0095 |
| S,Z,Y models misspecified | -52.27 | 1.41                | 75.96     | 0.0102 |
| CACE                      |        |                     |           |        |
| All models correct        | 8.15   | 12.41               | 94.84     | 0.3519 |
| S model misspecified      | 2.89   | 6.40                | 96.94     | 0.0811 |
| Z model misspecified      | 8.15   | 14.42               | 95.24     | 0.3519 |
| Y model misspecified      | 12.93  | 12.41               | 94.76     | 0.3550 |
| S,Z models misspecified   | 4.10   | 7.35                | 97.66     | 0.1225 |
| S,Z,Y models misspecified | 29.38  | 7.64                | 98.09     | 0.1337 |

Table 3: Results of truncation of the clever covariate to lessen sensitivity to practical positivity violations (from data-generating mechanism 2). Estimator performance under correct model specification across 10,000 simulations in terms of percent bias, estimator standard error  $\times \sqrt{n}$ , 95% confidence interval coverage, and mean squared error.

| Truncation Level                                                                                                                                                             | %Bias  | SE $\times \sqrt{n}$ | 95%CI Cov | MSE    |
|------------------------------------------------------------------------------------------------------------------------------------------------------------------------------|--------|----------------------|-----------|--------|
| N=5,000. The estimator standard error $\times \sqrt{n}$ should be compared to the efficiency bound, which is 2.68 for the ITTATE, 11.33 for the CACE, and 4.09 for the EACE. |        |                      |           |        |
| ITTATE                                                                                                                                                                       |        |                      |           |        |
| No modification                                                                                                                                                              | -0.88  | 2.68                 | 94.85     | 0.0015 |
| Truncation at 0.01/100                                                                                                                                                       | -0.87  | 2.68                 | 94.87     | 0.0015 |
| Truncation at 0.05/20                                                                                                                                                        | -0.87  | 2.48                 | 93.71     | 0.0014 |
| Truncation at 0.1/10                                                                                                                                                         | -0.74  | 2.05                 | 89.45     | 0.0012 |
| EACE                                                                                                                                                                         |        |                      |           |        |
| No modification                                                                                                                                                              | 0.18   | 3.60                 | 91.36     | 0.0029 |
| Truncation at 0.01/100                                                                                                                                                       | 2.29   | 3.23                 | 92.50     | 0.0024 |
| Truncation at 0.05/20                                                                                                                                                        | 2.71   | 2.40                 | 89.78     | 0.0016 |
| Truncation at 0.1/10                                                                                                                                                         | 2.60   | 1.90                 | 84.96     | 0.0013 |
| CACE                                                                                                                                                                         |        |                      |           |        |
| No modification                                                                                                                                                              | 2.57   | 11.42                | 94.96     | 0.0265 |
| Truncation at 0.01/100                                                                                                                                                       | 2.58   | 11.41                | 94.96     | 0.0265 |
| Truncation at 0.05/20                                                                                                                                                        | 2.59   | 10.57                | 93.80     | 0.0250 |
| Truncation at 0.1/10                                                                                                                                                         | 2.75   | 8.72                 | 89.74     | 0.0221 |
| N=500. The estimator standard error $\times \sqrt{n}$ should be compared to the efficiency bound, which is 0.85 for the ITTATE, 3.58 for the CACE, and 1.29 for the EACE.    |        |                      |           |        |
| ITTATE                                                                                                                                                                       |        |                      |           |        |
| No modification                                                                                                                                                              | 3.32   | 2.68                 | 92.09     | 0.0165 |
| Truncation at 0.01/100                                                                                                                                                       | 3.37   | 2.67                 | 92.11     | 0.0165 |
| Truncation at 0.05/20                                                                                                                                                        | 3.02   | 2.59                 | 92.45     | 0.0158 |
| Truncation at 0.1/10                                                                                                                                                         | 3.53   | 2.00                 | 87.86     | 0.0128 |
| EACE                                                                                                                                                                         |        |                      |           |        |
| No modification                                                                                                                                                              | -11.13 | 3.21                 | 87.31     | 0.0246 |
| Truncation at 0.01/100                                                                                                                                                       | -8.19  | 3.03                 | 87.64     | 0.0237 |
| Truncation at 0.05/20                                                                                                                                                        | -9.18  | 3.02                 | 87.21     | 0.0234 |
| Truncation at 0.1/10                                                                                                                                                         | -0.60  | 1.86                 | 82.70     | 0.0139 |
| CACE                                                                                                                                                                         |        |                      |           |        |
| No modification                                                                                                                                                              | 8.15   | 12.41                | 94.84     | 0.3519 |
| Truncation at 0.01/100                                                                                                                                                       | 8.20   | 12.38                | 94.84     | 0.3513 |
| Truncation at 0.05/20                                                                                                                                                        | 7.85   | 12.01                | 95.01     | 0.3354 |
| Truncation at 0.1/10                                                                                                                                                         | 7.84   | 9.34                 | 91.35     | 0.2729 |

## 6 Baseline covariates used in MTO application

An extensive set of baseline characteristics were included in applying our transport estimators to the MTO research question.

- Adolescent characteristics: age, gender, race, number of family members.
- Characteristics related to the child's behavior and learning: child was suspended or expelled from school during 2 years prior to baseline, child had gone to a special class or school or had gotten special help in school for behavioral or emotional problems during 2 years prior to baseline, child had gone to a special class or school or had gotten special help in school for a learning problem during 2 years prior to baseline, someone from school asked to discuss problems the child had with schoolwork or behavior during the 2 years prior to baseline, child enrolled in special class for gifted and talented students, child had problems that made it difficult to get to school or play active games/sports.
- Adult family member characteristics included: level of education, marital status, age at birth of the adolescent, work status, receipt of AFDC/TANF, car status, disability status.
- Neighborhood characteristics: family lived in neighborhood for at least 5 years; felt neighborhood streets were unsafe at night; household member had been assaulted, threatened with a knife or gun, or robbed during the 6 months prior to baseline; chat with a neighbor at least once per week; would likely tell neighbor if neighbor's child was getting into trouble; family living in neighborhood; friends in neighborhood; neighborhood satisfaction.
- Reported reasons for participating in MTO: to get away from drugs or gangs, to have access to better schools.
- Moving-related characteristics: confidence about finding an apartment in a different part of the city, moved more than 3 times during the 5 years prior to baseline, and previous application for Section 8 voucher.

## 7 R code

### 7.1 Code for TMLE functions

```

1 ## a variable needs to be named a and have values 0/1
2 ## site variable needs to be named 'site' and needs to have value 0 for the
   site where the outcome data is not used and value 1 for the site where
   the outcome data is used
3 ## z variable needs to be named z and have values 0/1
4 ## y variable needs to be named y and have values 0/1
5 ## w variables in a dataframe named w and with names w1:wx
6

```

```

7 ittatetmle<-function(a, z, y, site, w, aamodel, asitemodel, azmodel,
  aoutmodel, aq2model){
8   datw<-w
9   n.dat<-nrow(datw)
10
11  #calculate components of clever covariate
12  cpa <- predict(glm(formula=aamodel, family="binomial", data=data.frame(
  cbind(datw, a=a))), newdata=datw, type="response")
13  cps <- predict(glm(formula=asitemodel, data=data.frame(cbind(site=site,
  datw)), family="binomial"), type="response")
14
15  zmodels0 <- glm(formula=azmodel, data=data.frame(cbind(a=a, z=z, site=
  site, datw)), subset=site==0, family="binomial")
16  zmodels1 <- glm(formula=azmodel, data=data.frame(cbind(a=a, z=z, site=
  site, datw)), subset=site==1, family="binomial")
17  data_new0<-data_new1<-datw
18  data_new0$a<-0
19  data_new1$a<-1
20
21  dga1s0<-dbinom(z, 1, prob=predict(zmodels0, newdata=data_new1, type="
  response"))
22  dga1s1<-dbinom(z, 1, prob=predict(zmodels1, newdata=data_new1, type="
  response"))
23  dga0s0<-dbinom(z, 1, prob=predict(zmodels0, newdata=data_new0, type="
  response"))
24  dga0s1<-dbinom(z, 1, prob=predict(zmodels1, newdata=data_new0, type="
  response"))
25
26  #calculate clever covariate
27  g0w<-(1-cpa)*(dga0s1/dga0s0)*(cps/(1-cps))
28  g1w<-cpa*(dga1s1/dga1s0)*(cps/(1-cps))
29  h0w<-((1-a)*I(site==1))/g0w
30  h1w<-(a*I(site==1))/g1w
31
32  ymodel<-glm(formula=aoutmodel, family="binomial", data=data.frame(cbind(
  datw, a=a, z=z, site=site, y=y)), subset=site==1)
33
34  #initial prediction
35  q<-cbind(predict(ymodel, type="link", newdata=data.frame(cbind(datw, a=a,
  z=z))), predict(ymodel, type="link", newdata=data.frame(cbind(datw, a
  =0, z=z))), predict(ymodel, type="link", newdata=data.frame(cbind(datw
  , a=1, z=z))))
36
37  epsilon<-coef(glm(y ~ -1 + offset(q[,1]) + h0w + h1w, family="binomial",
  subset=site==1))
38
39  #update initial prediction
40  q1<- q + c((epsilon[1]*h0w + epsilon[2]*h1w), epsilon[1]/g0w, epsilon[2]
  /g1w)
41
42  predmodela0<-suppressWarnings(glm(formula=paste("plogis(q1)", aq2model,
  sep="~"), data=data.frame(cbind(w, a=a, site=site, q1=q1[,2])), subset
  =site==0 & a==0, family="binomial"))

```

```

43 predmodela1<-suppressWarnings(glm(formula=paste("plogis(q1)", aq2model,
44   sep="~"), data=data.frame(cbind(w,a=a, site=site, q1=q1[,3])), subset
   =site==0 & a==1, family="binomial"))
44 predmodelaa<-suppressWarnings(glm(formula=paste("plogis(q1) ~", aq2model,
   "+a", sep=""), data=data.frame(cbind(w, site=site, q1=q1[,1], a=a)),
   subset=site==0, family="binomial"))
45
46 #get initial prediction for second regression model
47 q2pred<-cbind(predict(predmodelaa, type="link", newdata=data.frame(cbind(
   datw, a=a))), predict(predmodela0, type="link", newdata=datw),
   predict(predmodela1, type="link", newdata=datw))
48
49 cz<-cbind(ifelse(a==0,I(site==0)/(1-cpa), I(site==0)/cpa), I(site==0)/(1-
   cpa), I(site==0)/cpa)
50
51 epsilon2<-suppressWarnings(coef(glm(plogis(q1[,1]) ~ -1 + offset(q2pred
   [,1]) + cz[,2] + cz[,3], family="binomial", subset= site==0)))
52 for(k in 1:2){
53   epsilon2[k]<-ifelse(is.na(epsilon2[k]), 0, epsilon2[k])
54 }
55
56 q2<- q2pred + c((epsilon2[1]*cz[,2] + epsilon2[2]*cz[,3]), epsilon2[1]/
   (1-cpa), epsilon2[2]/cpa)
57
58 tmleest<-mean(plogis(q2[,3][site==0]))-mean(plogis(q2[,2][site==0]))
59
60 ps0<-mean(I(site==0))
61
62 eic<-(((hlw/ps0) - (h0w/ps0))*(y - plogis(q[,1]))) + (((a*cz[,3]/ps0) -
   ((1-a)*cz[,2]/ps0))* (plogis(q[,1]) - plogis(q2pred[,1]))) + ((I(site
   ==0)/ps0)*((plogis(q2pred[,3]) - plogis(q2pred[,2])) - tmleest))
63
64 return(list("est"=tmleest, "var"=var(eic)/n.dat, "eic"=eic))
65
66 }
67
68 eatetmle<-function(a, z, y, site, w, nsitemodel, nzmodel, noutmodel){
69   datw<-w
70   n.dat<-nrow(w)
71
72   #calculate components of clever covariate
73   cps <- predict(glm(formula=nsitemodel, data=data.frame(cbind(site=site,
   datw)), family="binomial"), type="response")
74   cpz<-predict(glm(formula=nzmodel, data=data.frame(cbind(a=a, z=z, datw)),
   family="binomial"), type="response")
75
76   #calculate clever covariate
77   g0w<-((1-cpz)*cps)/(1-cps)
78   glw<- (cpz*cps)/(1-cps)
79   h0w<-((1-z)*I(site==1))/g0w
80   hlw<- (z*I(site==1))/glw
81

```

```

82 ymodel<-glm(formula=noutmodel, family="binomial", data=data.frame(cbind(
      datw, a=a, z=z, site=site, y=y)), subset=site==1)
83
84 data_new0<-data_new1<-datw
85 data_new0$z<-0
86 data_new1$z<-1
87 #initial predicition
88 q<-cbind(predict(ymodel, type="link", newdata=data.frame(cbind(datw, a=a,
      z=z))), predict(ymodel, type="link", newdata=data_new0), predict(
      ymodel, type="link", newdata=data_new1))
89
90 epsilon<-coef(glm(y ~ -1 + offset(q[,1]) + h0w + hlw, family="binomial",
      subset=site==1))
91
92 #update initial prediction
93 q1<- q + c((epsilon[1]*h0w + epsilon[2]*hlw), epsilon[1]/g0w, epsilon[2]/
      glw)
94
95 tmleest<-mean(plogis(q1[,3][site==0]))-mean(plogis(q1[,2][site==0]))
96
97 #get efficient influence curve values for everyone
98 ps0<-mean(I(site==0))
99
100 eic<-(((z*hlw/ps0) - ((1-z)*h0w/ps0))*(y - plogis(q[,1]))) + (I(site==0)/
      ps0*plogis(q1[,3])) - (I(site==0)/ps0*plogis(q1[,2])) - (tmleest/ps0)
101
102 return(list("est"=tmleest, "var"=var(eic)/n.dat, "eic"=eic[site==0]))
103 }
104
105 notransporttmle<-function(a,z,w, site, ntamodel, ntzmodel){
106   datw<-w
107
108   n.dat<-nrow(datw)
109   ps0<-mean(I(site==0))
110
111   #calculate components of clever covariate
112   cpa <- predict(glm(formula=ntamodel, data=data.frame(cbind(a=a, site=site
      , datw)), subset=site==0, family="binomial"), newdata=datw, type="
      response")
113
114   g0w<-1-cpa
115   glw<-cpa
116
117   #clever covariates
118   h0w<-I(site==0)*(1-a)/(g0w*ps0)
119   hlw<-I(site==0)*a/(glw*ps0)
120
121   zmodel<-glm(formula=ntzmodel, family="binomial", data=data.frame(cbind(a=a
      , z=z, site=site, datw)), subset=site==0)
122
123   data_new0<-data_new1<-datw
124   data_new0$a<-0
125   data_new1$a<-1

```

```

126
127 q<-cbind(predict(zmodel, type="link", newdata=data.frame(cbind(a=a, z=z,
128   datw))), predict(zmodel, type="link", newdata=data_new0), predict(
129   zmodel, type="link", newdata=data_new1)
130
131 epsilon<-coef(glm(z ~ -1 + offset(q[,1]) + h0w + hlw , family="binomial",
132   subset= site==0))
133
134 q1<- q + c((epsilon[1]*h0w + epsilon[2]*hlw), I(site==0)*epsilon[1]/(g0w*
135   ps0), I(site==0)*epsilon[2]/(glw*ps0))
136
137 tmleest<-mean(plogis(q1[,3][ site ==0]))-mean(plogis(q1[,2][ site ==0]))
138
139 eic<-(((a*hlw) - ((1-a)*h0w))*(z - plogis(q[,1])) + ((I(site==0)/ps0)*((
140   plogis(q1[,3]) - plogis(q1[,2])) - tmleest))
141
142 return(list("est"=tmleest, "var"=var(eic)/n.dat, "eic"=eic))
143 }
144
145
146
147 catetmle<-function(ca, cz, cy, csite, cw, czmodel, csitemodel, coutmodel,
148   cq2model){
149   datw<-cw
150   n.dat<-nrow(datw)
151   ps0<-mean(I(csite==0))
152   camodel<-"a ~ 1"
153
154   nottransportate<-nottransporttmle(a=ca, z=cz, site=csite, w=cw, ntamodel=
155     camodel, ntzmodel=czmodel)
156   ittate<-ittatetmle(a=ca, z=cz, y=cy, site=csite, w=cw, aamodel=camodel,
157     asitemodel=csitemodel, azmodel=czmodel, aoutmodel=coutmodel, aq2model
158     =cq2model)
159   cate<-ittate$est/nottransportate$est
160   varcate<-((ittate$est^2/nottransportate$est^2)*(((ittate$var*n.dat)/ittate$
161     est^2) - ((2*cov(cbind(ittate$eic, nottransportate$eic))[1,2])/(ittate
162     $est*nottransportate$est)) + ((nottransportate$var*n.dat)/
163     nottransportate$est^2))
164   eic<-((ittate$eic/nottransportate$est) - (ittate$est/(nottransportate$est^2)
165     )*nottransportate$eic)
166
167   return(list("est"=cate, "var"=var(eic)/n.dat, "eic"=eic))
168 }

```

## Functions.R

## 7.2 Code for example application

```

1 source("Functions.R")
2
3 n<-5000
4
5 site<-rbinom(n, 1, .5)

```

```

6
7 race<-rbinom(n,1, .4 + (.2*site))
8
9 crime<-rnorm(n, .1*site, 1)
10 discrimination<-rnorm(n, 1+(.2*site), 1)
11
12 #instrument
13 voucher<-rbinom(n, 1, .5)
14
15 #exposure
16 move0<-rbinom(n,1, plogis( -log(1.6) - log(1.1)*crime -log(1.3)*
17   discrimination))
18 move1<-rbinom(n,1, plogis( -log(1.6) +log(4) - log(1.1)*crime -log(1.3)*
19   discrimination))
20 move<-ifelse(voucher==1, move1, move0)
21
22 #outcomes
23 inschoola0<-rbinom(n,1, plogis(log(1.6) + (log(1.9)*move0) -log(1.3)*
24   discrimination - log(1.2)*race + log(1.2)*race*move0) )
25 inschoola1<-rbinom(n,1, plogis(log(1.6) + (log(1.9)*move1) - log(1.3)*
26   discrimination - log(1.2)*race+ log(1.2)*race*move1) )
27 inschoola<-ifelse(voucher==1, inschoola1, inschoola0)
28
29 dat<-data.frame( w2=crime, w3=discrimination, w1=race, site=site, a=
30   voucher, z=move, y=inschoola)
31
32 wmat<-data.frame(w1=dat$w1, w2=dat$w2, w3=dat$w3)
33
34 amodel<-"a ~ 1"
35 sitemodel<-"site ~ w1 + w2 + w3 "
36 zmodel<-"z ~ a + w2 + w3 "
37 outmodel<-"y ~ z + w1 +w3 + z:w1"
38 outmodelnoz<-"y ~ a + w1+w3+ a:w1"
39 q2model<-"w1 + w2 + w3 "
40
41 ittatetmletransportest<-ittatetmle(a=dat$a, z=dat$z, y=dat$y, site=dat$site
42   , w=wmat, aamodel=amodel, asitemodel=sitemodel, azmodel=zmodel,
43   aoutmodel=outmodel, aq2model=q2model)$est
44 catetmletransportest<-catetmle(ca=dat$a, cz=dat$z, cy=dat$y, csite=dat$site
45   , cw=wmat, csitemodel=sitemodel, czmodel=zmodel, coutmodel=outmodel,
46   cq2model=q2model)$est
47 eatetmletransportest<-eatetmle(a=dat$a, z=dat$z, y =dat$y, site=dat$site, w
48   =wmat, nsitemodel=sitemodel, nzmodel=zmodel, noutmodel=outmodel)$est

```

examp.R

## Bibliography

- Gill, R. D., Wellner, J. A. and Præstgaard, J. (1989) Non-and semi-parametric maximum likelihood estimators and the von mises method (part 1)[with discussion and reply]. *Scandinavian Journal of Statistics*, 97–128.



Van der Laan, M. J. and Robins, J. M. (2003) *Unified methods for censored longitudinal data and causality*. Springer.
